# Supplementary material for: Black Carbon Emissions Generally Underestimated in the Global South as Revealed by Globally Distributed Measurements
Source: Research Square preprint supplement (doi:10.21203/rs.3.rs-6024974/v1), 2025-02-17
Supplement: Supplementary file 1 [file 3cee66583f41b9f7f92d6bf2.pdf]

**Black Carbon Emissions Generally Underestimated in the Global South as  
Revealed by Globally Distributed Measurements**

Yuxuan Ren<sup>1\*</sup>, Christopher R. Oxford<sup>1</sup>, Dandan Zhang<sup>1</sup>, Xuan Liu<sup>1,2</sup>, Haihui Zhu<sup>1</sup>, Ann M. Dillner<sup>3</sup>, Warren H. White<sup>4</sup>, Rajan K. Chakrabarty<sup>1</sup>, Sina Hasheminassab<sup>5</sup>, David Diner<sup>5</sup>, Emmie Le Roy<sup>1</sup>, Joshin Kumar<sup>1</sup>, Valerie Viteri<sup>1</sup>, Keyao Song<sup>1</sup>, Clement Akoshile<sup>6</sup>, Omar Amador-Muñoz<sup>7</sup>, Araya Asfaw<sup>8</sup>, Rachel Ying-Wen Chang<sup>9</sup>, Diana Francis<sup>10</sup>, Paterné Gahungu<sup>11</sup>, Rebecca M. Garland<sup>12,13</sup>, Michel Grutter<sup>7</sup>, Jhoon Kim<sup>14</sup>, Kristy Langerman<sup>15</sup>, Pei-Chen Lee<sup>16</sup>, Puji Lestari<sup>17</sup>, Olga L. Mayol-Bracero<sup>18</sup>, Mogesh Naidoo<sup>12</sup>, Narendra Nelli<sup>10</sup>, Norman O'Neil<sup>19</sup>, Sang Seo Park<sup>20</sup>, Abdus Salam<sup>21</sup>, Bighnaraj Sarangi<sup>18</sup>, Yoav Schechner<sup>22</sup>, Robyn Schofield<sup>23</sup>, Sachchida N. Tripathi<sup>24,25</sup>, Eli Windwer<sup>26</sup>, Ming-Tsang Wu<sup>27,28</sup>, Qiang Zhang<sup>29</sup>, Yinon Rudich<sup>26</sup>, Michael Brauer<sup>30</sup>, and Randall V. Martin<sup>1</sup>

<sup>1</sup>Department of Energy, Environmental & Chemical Engineering, Washington University in St. Louis, St. Louis, Missouri 63130, United States

<sup>2</sup>Scripps Institution of Oceanography, University of California San Diego, San Diego, California 92093, United States

<sup>3</sup>Air Quality Research Center, University of California Davis, Davis, California 95616, United States

<sup>4</sup>Crocker Nuclear Laboratory, University of California Davis, Davis, California 95616, United States

<sup>5</sup>Jet Propulsion Laboratory, California Institute of Technology, Pasadena, California 91109, United States

<sup>6</sup>Department of Physics, University of Ilorin, Ilorin, 240003, Nigeria

<sup>7</sup>Instituto de Ciencias de la Atmósfera y Cambio Climático, Universidad Nacional Autónoma de México, Mexico City, 04510, Mexico

<sup>8</sup>Institute of Geophysics and Space Science, Addis Ababa University, Addis Ababa, 1176, Ethiopia

29 <sup>9</sup>Department of Physics and Atmospheric Science, Dalhousie University, Halifax, Nova  
30 Scotia B3H 4R2, Canada

31 <sup>10</sup>Environmental and Geophysical Sciences Lab, Earth Science Department, Khalifa  
32 University, Abu Dhabi, 127788, United Arab Emirates

33 <sup>11</sup>Institute of Applied Statistics, University of Burundi, Bujumbura, BP1550, Burundi

34 <sup>12</sup>Council for Scientific and Industrial Research, Pretoria, 0001, South Africa

35 <sup>13</sup>Department of Geography, Geo-Informatics and Meteorology, University of Pretoria,  
36 Pretoria, 0002, South Africa

37 <sup>14</sup>Department of Atmospheric Sciences, Yonsei University, Seoul, 03722, Republic of  
38 Korea

39 <sup>15</sup>Department of Geography, Environmental Management and Energy Studies,  
40 University of Johannesburg, Johannesburg, 2006, South Africa

41 <sup>16</sup>Department of Public Health, National Cheng Kung University, Tainan, 701, Taiwan

42 <sup>17</sup>Faculty of Civil and Environmental Engineering, Bandung Institute of Technology,  
43 Bandung, 40132, Indonesia

44 <sup>18</sup>Department of Environmental Science, University of Puerto Rico, Puerto Rico, 00931,  
45 United States

46 <sup>19</sup>Department of Applied Geomatics, University of Sherbrooke, Sherbrooke, Quebec  
47 J1K 2R1, Canada

48 <sup>20</sup>Department of Urban and Environmental Engineering, Ulsan National Institute of  
49 Science and Technology, Ulsan, 44919, Republic of Korea

50 <sup>21</sup>Department of Chemistry, University of Dhaka, Dhaka, 1000, Bangladesh

51 <sup>22</sup>Department of Electrical Engineering, Technion Israel Institute of Technology, Haifa,  
52 3200003, Israel

53 <sup>23</sup>School of Geography, Earth and Atmospheric Sciences, University of Melbourne,  
54 Melbourne, 3010, Australia

55 <sup>24</sup>Department of Civil Engineering, Indian Institute of Technology Kanpur, Kanpur,  
56 208016, India

57 <sup>25</sup>Department of Sustainable Energy Engineering, Indian Institute of Technology  
58 Kanpur, Kanpur, 208016, India  
59 <sup>26</sup>Department of Earth and Planetary Sciences, Weizmann Institute of Science, Rehovot,  
60 76100, Israel  
61 <sup>27</sup>Department of Family Medicine, Kaohsiung Medical University Hospital, Kaohsiung  
62 Medical University, Kaohsiung, 807, Taiwan  
63 <sup>28</sup>PhD Program in Environmental and Occupational Medicine, Kaohsiung Medical  
64 University, Kaohsiung, 807, Taiwan  
65 <sup>29</sup>School of Environment, Tsinghua University, Beijing, 100084, China  
66 <sup>30</sup>School of Population and Public Health, University of British Columbia, Vancouver,  
67 British Columbia V6T 1Z3, Canada  
68 \*Email: ren.yuxuan@wustl.edu  
69 **Contents of this file**  
70 This Supplementary Information contains Text S1 and S2, Tables S1 to S3, and Figures  
71 S1 to S7.

## Text S1. Statistics Calculation

We mainly use the coefficient of determination ( $r^2$ ), normalized mean bias (NMB, Eq. 1), and normalized mean difference (NMD, Eq. 2) to evaluate simulated BC concentrations ( $C_{sim}$ ) using coincident measurements ( $C_{meas}$ ) across a total of  $N$  SPARTAN sites.

$$NMB = \frac{\sum_{i=1}^N (C_{sim,i} - C_{meas,i})}{\sum_{i=1}^N C_{meas,i}} \quad (1)$$

$$NMD = \frac{\sum_{i=1}^N |C_{sim,i} - C_{meas,i}|}{\sum_{i=1}^N C_{meas,i}} \quad (2)$$

where  $C_{sim,i}$  is the simulated BC concentration at SPARTAN site  $i$ ,  $C_{meas,i}$  is the measured BC concentration at the same site, and  $|C_{sim,i} - C_{meas,i}|$  is the absolute difference between the simulated and measured concentrations.

## Text S2. Representativeness Bias

Differences in representativeness between measurements and simulations arise from comparing a point measurement with an area average, magnified by the tendency for measurements to be in locations with elevated BC concentrations<sup>1-3</sup>. To examine this potential bias, we perform GCHP sensitivity simulations at the finest available meteorological resolution of C720 (~12 km) and compare BC concentrations with those from simulations at C360 (~25 km) resolution in 2022, the year in which archival began of the GEOS-FP C720 meteorological data. A full-year simulation at C720 would be computationally prohibitive. However, a high level of consistency is found between BC concentrations in the C360 and C720 simulations (Figure S7), indicating that comparing BC simulations at approximately 25 km resolution with point measurements would yield similar results as using a 12 km simulation. The most prominent exception is for Beijing in January, where and when the C720 has BC concentrations that are 22% lower than at C360, partially explaining the anomaly apparent in Figure 2. Moreover, SPARTAN stations are mostly located on rooftops with a mean height of 17 m, which

97 increases their spatial fetch ([Table S1](#)), generally reducing differences between volume-  
98 averaged modeled concentrations and point measurements.

99 **Tables**

100

101 **Table S1.** Location information of SPARTAN sites used in this study.

| Site         | Host Institute                                     | Latitude | Longitude | Rooftop Height (m) |
|--------------|----------------------------------------------------|----------|-----------|--------------------|
| Abu Dhabi    | Masdar Institute                                   | 24.44    | 54.62     | 27                 |
| Addis Ababa  | Addis Ababa University                             | 9.01     | 38.82     | 3                  |
| Bandung      | Institute of Technology Bandung                    | -6.89    | 107.61    | 30                 |
| Beijing      | Tsinghua University                                | 40.00    | 116.33    | 9                  |
| Bujumbura    | University of Burundi                              | -3.38    | 29.38     | 12                 |
| Dhaka        | Dhaka University                                   | 23.73    | 90.40     | 22                 |
| Fajardo      | Cabezas de San Juan Nature Reserve                 | 18.38    | -65.62    | 4                  |
| Haifa        | Technion Israel Institute of Technology            | 32.78    | 35.02     | 32                 |
| Halifax      | Dalhousie University                               | 44.64    | -63.59    | 13                 |
| Ilorin       | Ilorin University                                  | 8.48     | 4.67      | 11                 |
| Johannesburg | University of Johannesburg                         | -26.18   | 28.00     | 11                 |
| Kanpur       | Indian Institute of Technology Kanpur              | 26.51    | 80.23     | 8                  |
| Kaohsiung    | Kaohsiung Medical University                       | 22.65    | 120.31    | 15                 |
| Melbourne    | University of Melbourne                            | -37.80   | 144.96    | 57                 |
| Mexico City  | Universidad Nacional Autónoma de México            | 19.33    | -99.18    | 16                 |
| Pasadena     | Jet Propulsion Laboratory                          | 34.20    | -118.17   | 15                 |
| Pretoria     | Council for Scientific and Industrial Research     | -25.76   | 28.28     | 13                 |
| Rehovot      | Weizmann Institute                                 | 31.91    | 34.81     | 16                 |
| Seoul        | Yonsei University                                  | 37.56    | 126.93    | 25                 |
| Sherbrooke   | Sherbrooke University                              | 45.38    | -71.93    | 9                  |
| Taipei       | National Taiwan University                         | 25.04    | 121.50    | 10                 |
| Ulsan        | Ulsan National Institute of Science and Technology | 35.58    | 129.19    | 12                 |

102

103 **Table S2.** Sampling information and BC concentration ( $\mu\text{g}/\text{m}^3$ ) for SPARTAN sites  
104 used in this study.

| Site         | Start Date | Most Recent Sample Date | Sampling Seasons <sup>a</sup> | Start Date for MAIA Sites <sup>b</sup> | <i>N</i> <sup>c</sup> | Mean (Median) | Standard Error |
|--------------|------------|-------------------------|-------------------------------|----------------------------------------|-----------------------|---------------|----------------|
| Abu Dhabi    | 4/26/2019  | 12/23/2023              | DJF, MAM, JJA, SON            |                                        | 113                   | 2.7 (2.7)     | 0.11           |
| Addis Ababa  | 12/7/2022  | 12/27/2023              | DJF, MAM, JJA, SON            | 12/7/2022                              | 116                   | 4.8 (4.5)     | 0.19           |
| Bandung      | 9/6/2019   | 7/11/2021               | DJF, MAM, JJA, SON            |                                        | 23                    | 3.7 (3.9)     | 0.20           |
| Beijing      | 3/24/2020  | 11/28/2023              | DJF, MAM, JJA, SON            | 8/30/2022                              | 153                   | 1.4 (1.3)     | 0.090          |
| Bujumbura    | 12/9/2022  | 12/26/2023              | DJF, MAM, JJA, SON            |                                        | 18                    | 3.7 (3.2)     | 0.40           |
| Dhaka        | 8/11/2020  | 10/7/2023               | MAM, JJA, SON                 |                                        | 52                    | 5.6 (5.4)     | 0.86           |
| Fajardo      | 3/18/2021  | 12/24/2023              | DJF, MAM, JJA, SON            |                                        | 34                    | 0.11 (0.083)  | 0.017          |
| Haifa        | 2/16/2022  | 6/17/2023               | DJF, MAM, JJA, SON            | 2/16/2022                              | 143                   | 0.85 (0.63)   | 0.10           |
| Halifax      | 6/14/2019  | 10/24/2023              | DJF, MAM, JJA, SON            |                                        | 112                   | 0.23 (0.21)   | 0.015          |
| Ilorin       | 7/13/2019  | 12/1/2021               | DJF, MAM, JJA, SON            |                                        | 36                    | 3.0 (2.2)     | 0.61           |
| Johannesburg | 4/7/2022   | 12/28/2023              | DJF, MAM, JJA, SON            | 4/7/2022                               | 168                   | 2.4 (2.3)     | 0.18           |
| Kanpur       | 7/14/2021  | 5/24/2022               | DJF, MAM, JJA                 |                                        | 14                    | 3.8 (3.0)     | 0.73           |
| Kaohsiung    | 8/20/2022  | 12/29/2023              | DJF, MAM, JJA, SON            | 8/20/2022                              | 123                   | 1.3 (1.4)     | 0.12           |
| Melbourne    | 8/9/2022   | 12/28/2023              | DJF, MAM, JJA, SON            |                                        | 34                    | 0.43 (0.32)   | 0.061          |
| Mexico City  | 2/26/2021  | 12/24/2023              | DJF, MAM, JJA, SON            |                                        | 52                    | 2.1 (2.0)     | 0.11           |
| Pasadena     | 11/9/2021  | 11/15/2023              | DJF, MAM, JJA, SON            | 11/9/2021                              | 233                   | 0.47 (0.44)   | 0.030          |
| Pretoria     | 10/22/2020 | 12/27/2023              | DJF, MAM, JJA, SON            | 4/15/2021                              | 233                   | 2.1 (2.0)     | 0.24           |
| Rehovot      | 7/2/2020   | 6/7/2023                | DJF, MAM, JJA, SON            | 11/5/2021                              | 178                   | 1.2 (1.0)     | 0.11           |
| Seoul        | 9/11/2020  | 12/30/2023              | DJF, MAM, JJA, SON            |                                        | 65                    | 1.2 (1.1)     | 0.094          |
| Sherbrooke   | 8/29/2019  | 6/21/2023               | DJF, MAM, JJA, SON            |                                        | 67                    | 0.36 (0.28)   | 0.049          |
| Taipei       | 1/27/2022  | 12/31/2023              | DJF, MAM, JJA, SON            | 1/27/2022                              | 218                   | 0.83 (0.75)   | 0.040          |
| Ulsan        | 10/28/2021 | 12/23/2023              | DJF, MAM, JJA, SON            |                                        | 92                    | 0.78 (0.74)   | 0.043          |

105 <sup>a</sup> DJF includes December, January, and February; MAM includes March, April, and May; JJA  
106 includes June, July, and August; SON includes September, October, and November.

107 <sup>b</sup> These sites began using the MAIA sampling protocol on the specified date.

108 <sup>c</sup> *N* is the number of samples from each site included in this study.

109 **Table S3.** Sampling information and BC concentration for other individual measurements referenced in this study. Mass absorption cross section  
110 (MAC, m<sup>2</sup>/g) values at 880 nm and estimated values at 633 nm are provided for measurements using aethalometers when available.

| Country     | Site         | Latitude | Longitude | Location Type | Instrument                                       | MAC at 880 nm (m <sup>2</sup> /g) | MAC at 633 nm (m <sup>2</sup> /g) <sup>a</sup> | Sampling Period       | BC (μg/m <sup>3</sup> ) | Source                                                 |
|-------------|--------------|----------|-----------|---------------|--------------------------------------------------|-----------------------------------|------------------------------------------------|-----------------------|-------------------------|--------------------------------------------------------|
| Argentina   | Buenos Aires | -34.56   | -58.51    | suburban      | Aethalometer (AE42)                              | 16.6                              | 23.1                                           | Nov 2014 to Mar 2016  | 3.18                    | <a href="#">Resquin et al.<sup>4</sup></a>             |
| Bolivia     | La Paz       | -16.50   | -68.13    | urban         | Aethalometer (AE33)                              | 7.77                              | 10.8                                           | Jan to Jun, 2018      | 1.6                     | <a href="#">Mardoñez-Balderrama et al.<sup>5</sup></a> |
| Ivory Coast | Lamto        | 6.22     | -5.03     | rural         | Aethalometer (AE31)                              | 16.6                              | 23.1                                           | Jan 2015 to May 2017  | 1.4                     | <a href="#">Kouassi et al.<sup>6</sup></a>             |
| Mexico      | Monterrey    | 25.75    | -100.26   | urban         | Aethalometer (AE33)                              | 16.6                              | 23.1                                           | Jan to Dec, 2016      | 2.46                    | <a href="#">Peralta et al.<sup>7</sup></a>             |
| Morocco     | Kenitra city | 34.23    | -6.61     | urban         | Aethalometer (AE31)                              | 16.6                              | 23.1                                           | July 2020 to Feb 2021 | 0.9                     | <a href="#">Bounakhla et al.<sup>8</sup></a>           |
| Peru        | Hyo          | -12.04   | -75.32    | rural         | Aethalometer (AE33)                              | 7.77                              | 10.8                                           | May 2022 to Oct 2023  | 0.65                    | <a href="#">Villalobos-Puma et al.<sup>9</sup></a>     |
| Rwanda      | Kigali       | -1.96    | 30.06     | urban         | Portable Black Carbon Monitors (BC1060)          | NaN                               | NaN                                            | Jan to Dec, 2020      | 7.8                     | <a href="#">Kalisa and Adams<sup>10</sup></a>          |
| Mozambique  | Manhiça      | -25.41   | 32.81     | semi-rural    | Sunset OC-EC Aerosol Analyzer                    | NaN                               | NaN                                            | 2014 to 2015          | 0.9                     | <a href="#">Curto et al.<sup>11</sup></a>              |
| Cotonou     | Benin        | 6.35     | -2.43     | urban         | Thermal/Optical Carbon Analyzer (DRI Model 2001) | NaN                               | NaN                                            | Feb 2015 to Mar 2017  | 2                       | <a href="#">Djossou et al.<sup>12</sup></a>            |
| Ivory Coast | Abidjan      | 5.33     | -4.02     | urban         | Thermal/Optical Carbon Analyzer (DRI Model 2001) | NaN                               | NaN                                            | Feb 2015 to Mar 2017  | 7                       | <a href="#">Djossou et al.<sup>12</sup></a>            |

111 <sup>a</sup> In aethalometer studies, MAC measurements at 880 nm are typically used to calculate BC concentrations<sup>4</sup>. For direct comparison, we adjust the MAC values  
112 to 633 nm, the wavelength used in Hybrid Integrating Plate/Sphere (HIPS) measurements in SPARTAN. This adjustment assumes that MAC varies inversely  
113 with wavelength and that the particles are small relative to the wavelength<sup>13</sup>.



Figures

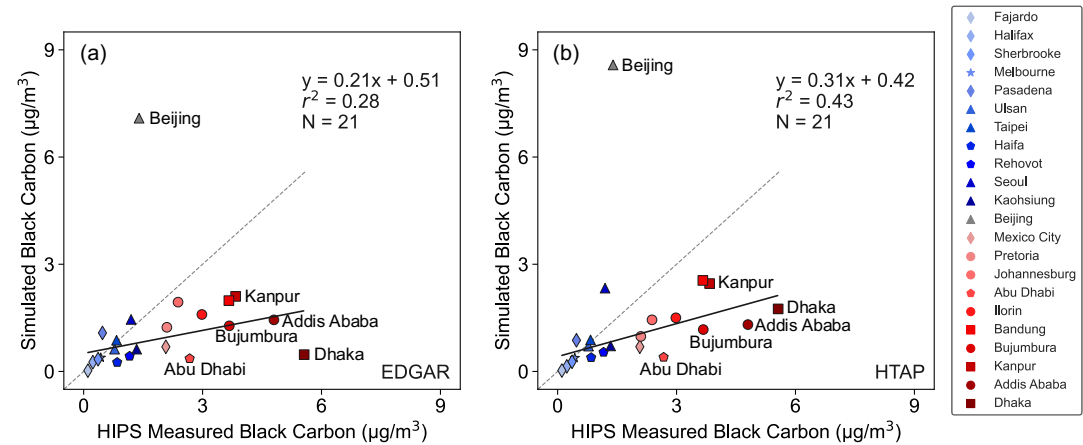

**Figure S1.** Annual mean BC concentrations across SPARTAN sites, with GCHP simulations using different inventories at C360 resolution (~25 km) in 2019 and SPARTAN measurements from 2019 to 2023. (a) EDGAR and (b) HTAP. Annotations include the line of best fit ( $y$ ), coefficient of variation ( $r^2$ ), and number of comparison points ( $N$ ). The lowest half of the measured concentrations are indicated in blue and the upper half in red. The Beijing site, marked in grey, is excluded from statistical calculations due to anomalies in its emissions estimates. Symbols indicate different regions (diamonds for North America, star for Australia, triangles for East Asia, pentagons for the Middle East, circles for Africa, and squares for South Asia).

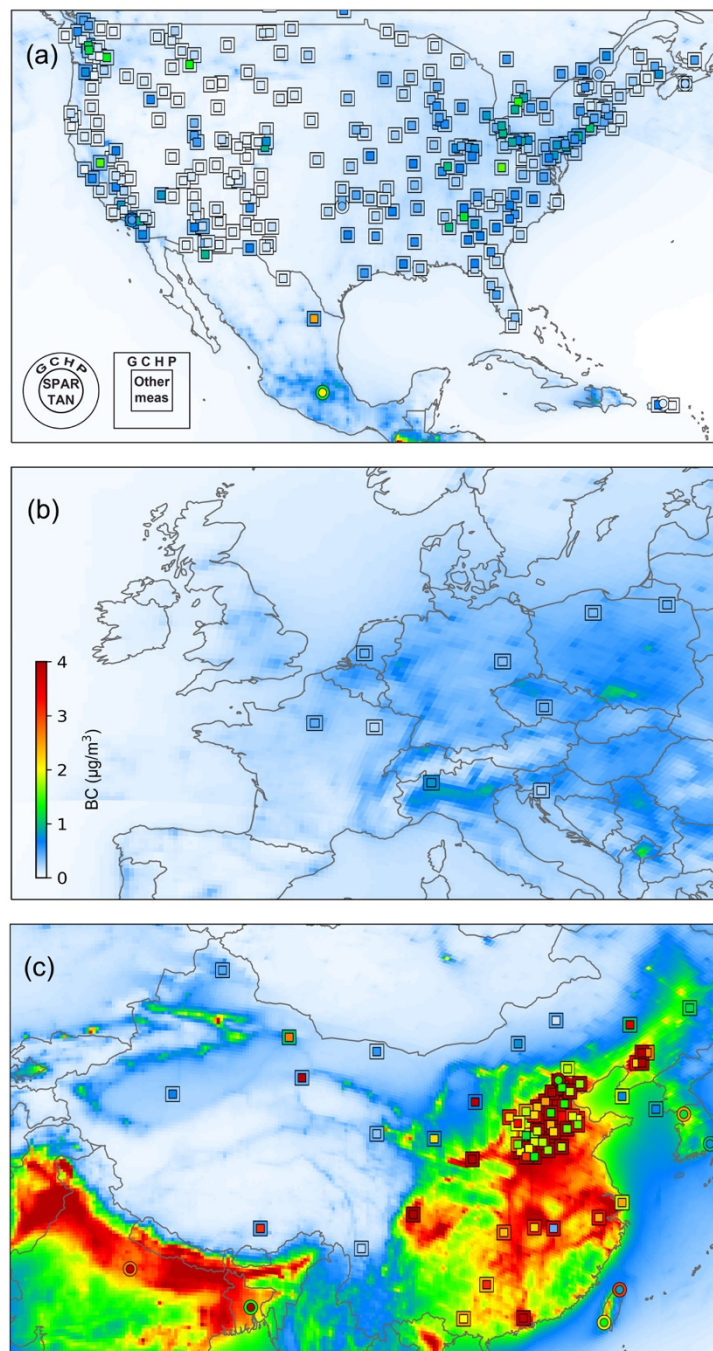

**Figure S2.** BC concentrations from measurements and simulations across different regions: (a) North America, (b) Europe, and (c) East Asia. SPARTAN and additional measurements are represented by colored circles and squares, respectively, surrounded by concentric circles and squares indicating local GCHP concentrations using the CEDS inventory. A GCHP C360 (~25 km) simulation using the CEDS inventory is in the background.

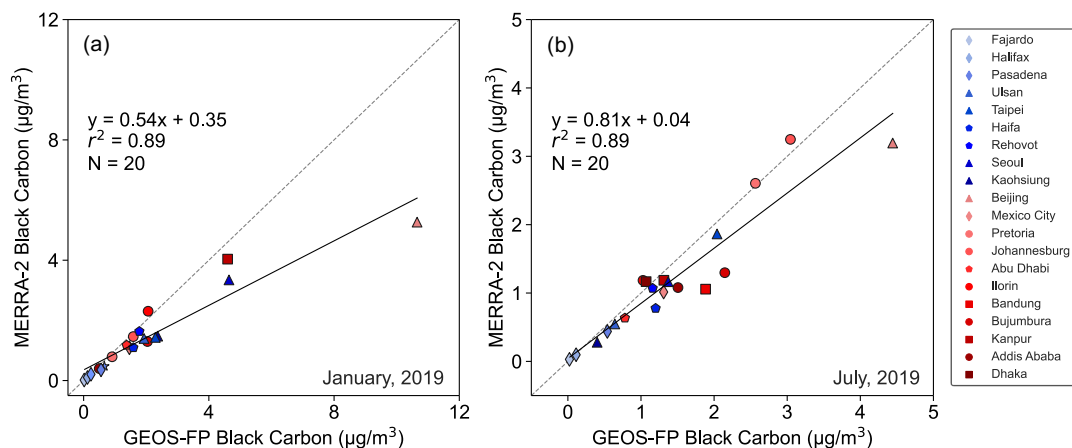

**Figure S3.** Mean BC concentrations across SPARTAN sites, with GCHP simulations using different meteorology (GEOS-FP vs MERRA-2) at C180 resolution (~50 km) in 2019. (a) January and (b) July. Annotations include the line of best fit ( $y$ ), coefficient of variation ( $r^2$ ), and number of comparison points ( $N$ ). Symbols indicate different regions (diamonds for North America, triangles for East Asia, pentagons for the Middle East, circles for Africa, and squares for South Asia).

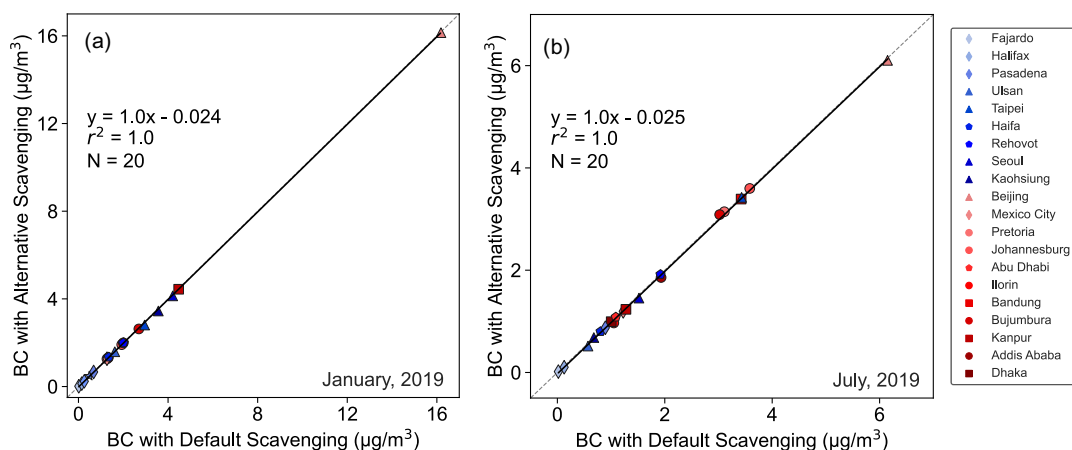

**Figure S4.** Mean simulated BC concentrations across SPARTAN sites, with GCHP simulations using alternative scavenging at C360 resolution (~25 km) in 2019. (a) January and (b) July. Annotations include the line of best fit ( $y$ ), coefficient of variation ( $r^2$ ), and number of comparison points ( $N$ ). Symbols indicate different regions (diamonds for North America, triangles for East Asia, pentagons for the Middle East, circles for Africa, and squares for South Asia).

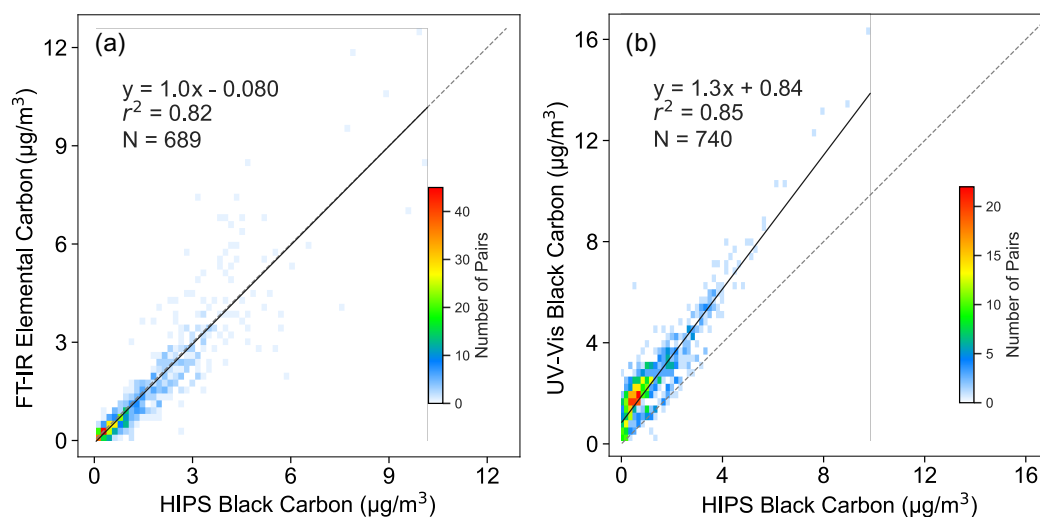

**Figure S5.** Comparison of BC concentrations measured by HIPS, FT-IR, and UV-Vis in SPARTAN. (a) HIPS vs FT-IR and (b) HIPS vs UV-Vis. Annotations include the line of best fit ( $y$ ), coefficient of variation ( $r^2$ ), and number of comparison points ( $N$ ).

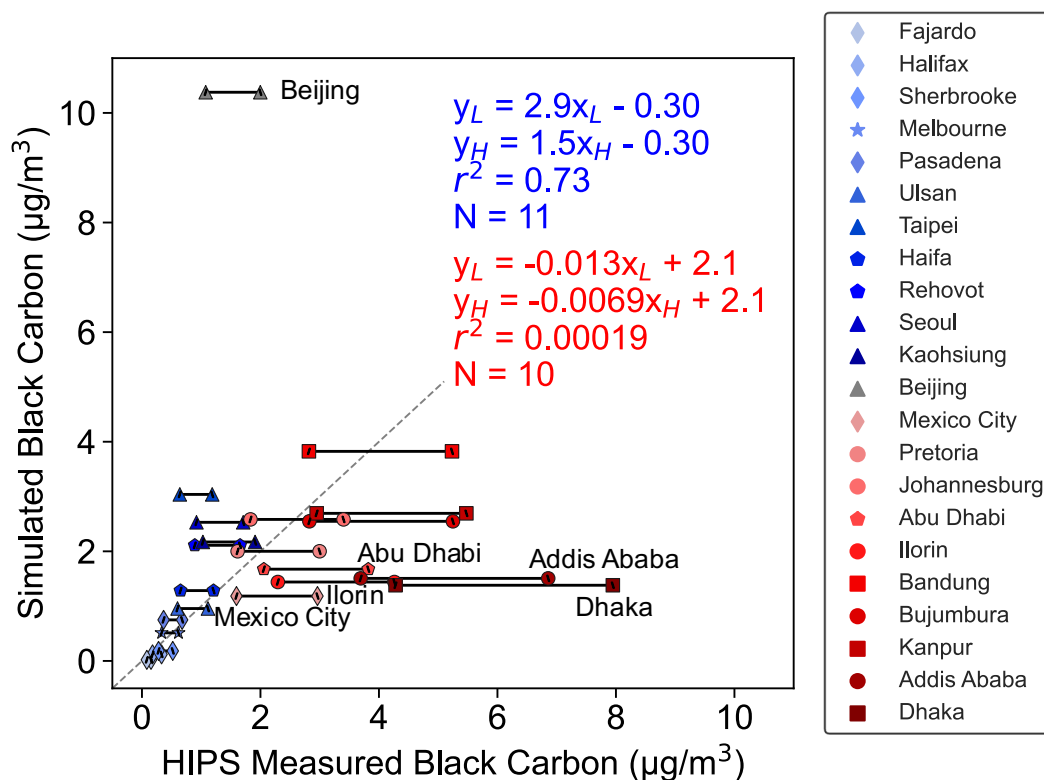

**Figure S6.** Annual mean BC concentrations across SPARTAN sites, with GCHP simulations using the CEDS inventory and HIPS measurements using varying MAC values from 7  $\text{m}^2/\text{g}$  to 13  $\text{m}^2/\text{g}$ . The simulations are from 2019, while the measurements are from 2019 to 2023. Annotations include the line of best fit ( $y$ ), coefficient of variation ( $r^2$ ), and number of comparison points ( $N$ ). A MAC of 7  $\text{m}^2/\text{g}$  is represented by leftmost markers filled with a forward slash and a line of best fit ( $y_L$ ) indicating lower BC concentrations, while a MAC of 13  $\text{m}^2/\text{g}$  is represented by rightmost markers filled with a backslash and a line of best fit ( $y_H$ ) indicating higher BC concentrations. The lowest half of the measured concentrations are indicated in blue and the upper half in red. The Beijing site, marked in grey, is excluded from statistical calculations due to anomalies in its emissions estimates. Symbols indicate different regions (diamonds for North America, star for Australia, triangles for East Asia, pentagons for the Middle East, circles for Africa, and squares for South Asia).

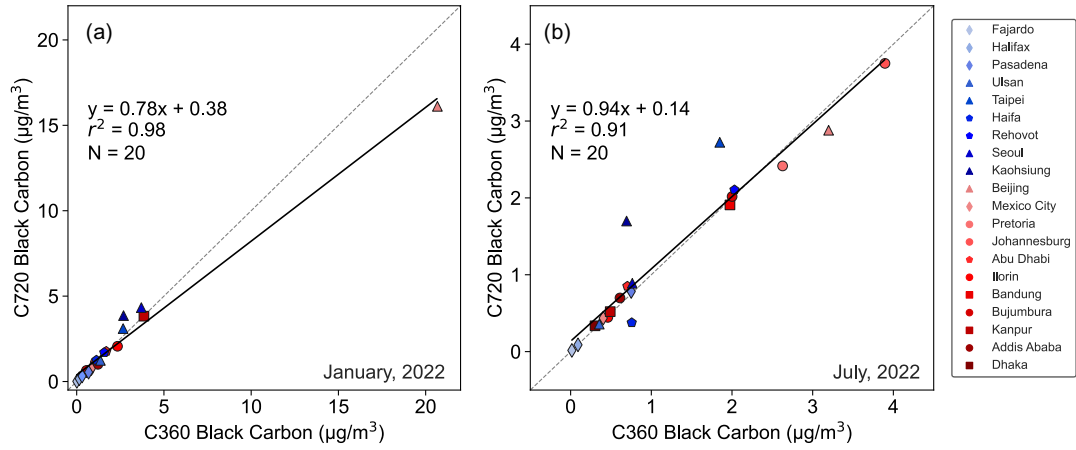

**Figure S7.** Mean simulated BC concentrations across SPARTAN sites, with GCHP simulations using the CEDS inventory at C360 (~25 km) and C720 (~12 km) in 2022. (a) January and (b) July. Annotations include the line of best fit ( $y$ ), coefficient of variation ( $r^2$ ), and number of comparison points ( $N$ ). Symbols indicate different regions (diamonds for North America, triangles for East Asia, pentagons for the Middle East, circles for Africa, and squares for South Asia).

## References

1. Gilardoni, S., Vignati, E. & Wilson, J. Using measurements for evaluation of black carbon modeling. *Atmos. Chem. Phys.* **11**, 439–455 (2011).
2. Swall, J. L. & Foley, K. M. The impact of spatial correlation and incommensurability on model evaluation. *Atmos. Environ.* **43**, 1204–1217 (2009).
3. Wang, R. et al. Spatial representativeness error in the ground-level observation networks for black carbon radiation absorption. *Geophys. Res. Lett.* **45**, 2106–2114 (2018).
4. Resquin, M. D. et al. Local and remote black carbon sources in the Metropolitan Area of Buenos Aires. *Atmos. Environ.* **182**, 105–114 (2018).
5. Mardoñez-Balderrama, V. et al. Atmospheric black carbon in the metropolitan area of La Paz and El Alto, Bolivia: concentration levels and emission sources. *Atmos. Chem. Phys.* **24**, 12055–12077 (2024).
6. Kouassi, A. et al. Measurement of atmospheric black carbon concentration in rural and urban environments: cases of Lamto and Abidjan. *J. Environ. Prot.* **12**, 855–872, (2021).
7. Peralta, O. et al. Atmospheric black carbon concentrations in Mexico. *Atmos. Res.* **230**, 104626 (2019).
8. Bounakhla, Y. et al. Black carbon aerosols at an urban site in North Africa (Kenitra, Morocco). *Atmos. Pollut. Res.* **13**, 101489 (2022).
9. Villalobos-Puma, E. et al. Atmospheric black carbon observations and its valley-mountain dynamics: eastern cordillera of the central Andes of Peru. *Environ. Pollut.* **355**, 124089 (2024).
10. Kalisa, E. & Adams, M. Population-scale COVID-19 curfew effects on urban black carbon concentrations and sources in Kigali, Rwanda. *Urban Clim.* **46**, 101312 (2022).
11. Curto, A. et al. Predictors of personal exposure to black carbon among women in southern semi-rural Mozambique. *Environ. Int.* **131**, 104962 (2019).
12. Djossou, J. et al. Mass concentration, optical depth and carbon composition of particulate matter in the major southern West African cities of Cotonou (Benin) and Abidjan (Cote d'Ivoire). *Atmos. Chem. Phys.* **18**, 6275–6291 (2018).
